# Supplementary material
Source: MDPI journal article supplement (https://www.mdpi.com/2076-3417/11/18/8401)
Supplement: s1 [file s1]

UV/vis spectra of CV in electrochemical oxidation process on Ti/Pt/SnO<sub>2</sub> anode

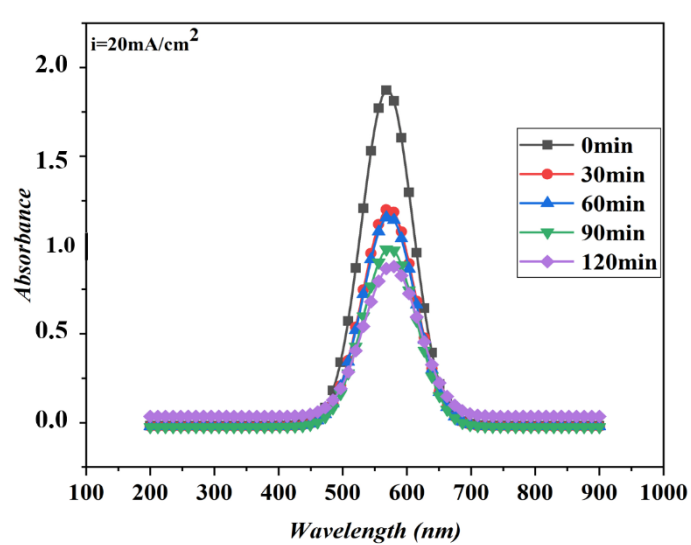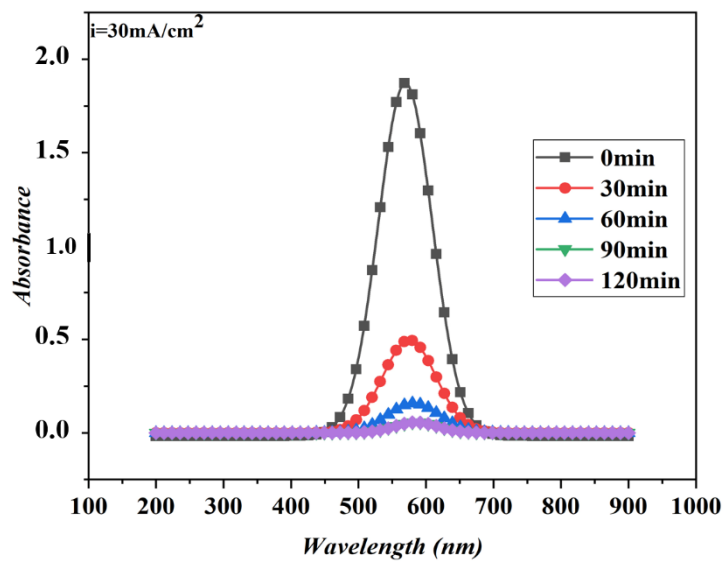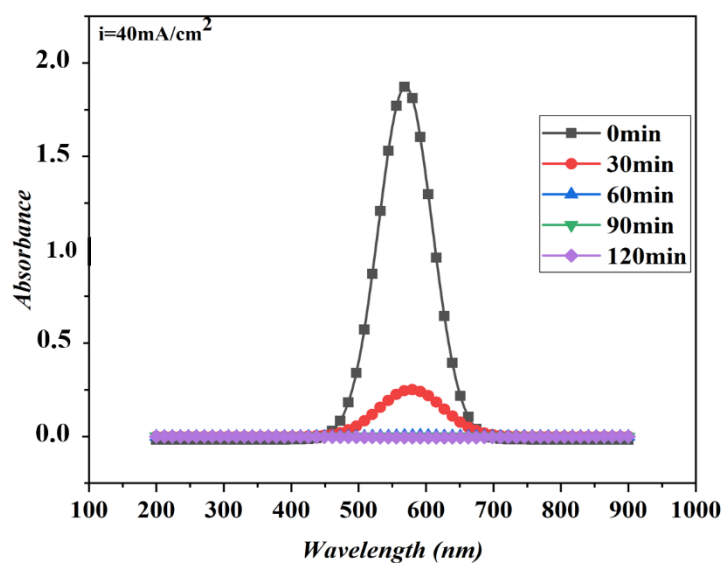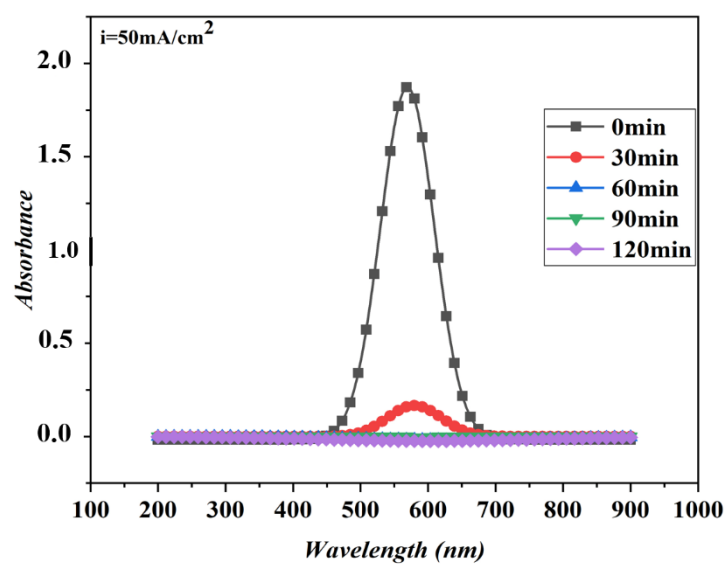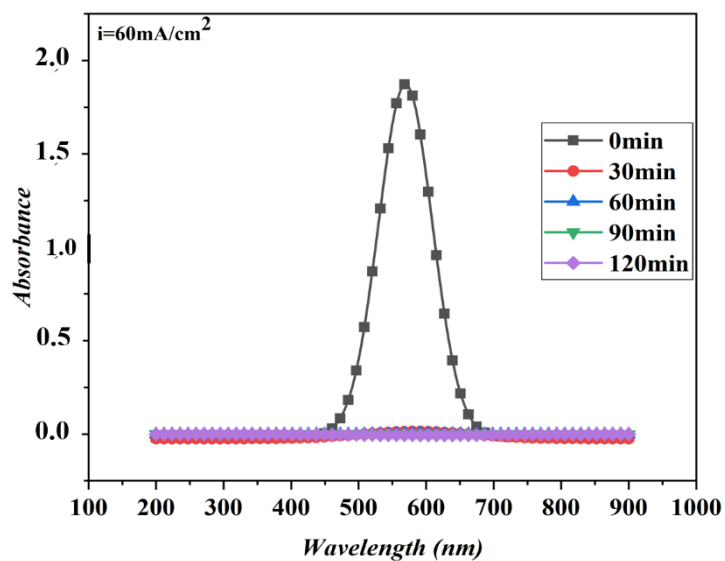

**Figure S1.** The UV/vis spectra of CV in electrochemical oxidation process on Ti/Pt/SnO<sub>2</sub> anode with ([CV]<sub>0</sub>=10 mg L<sup>-1</sup>, initial pH=7, temperature=25 °C) at different of current density.

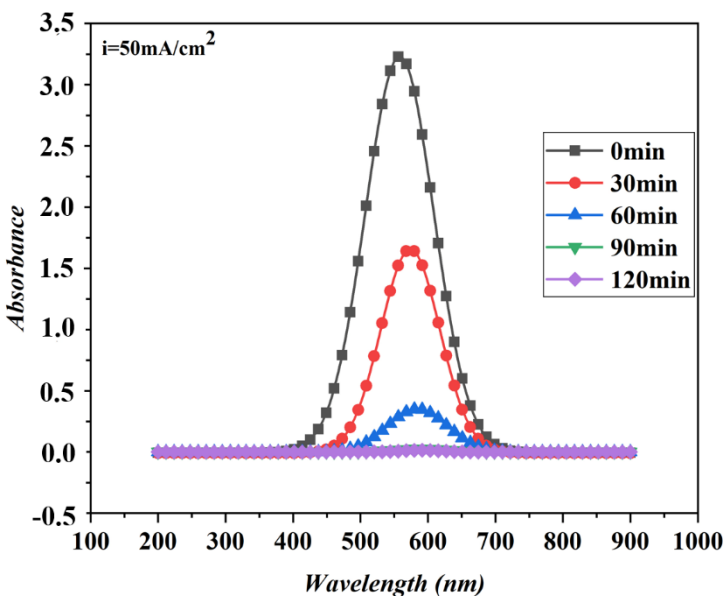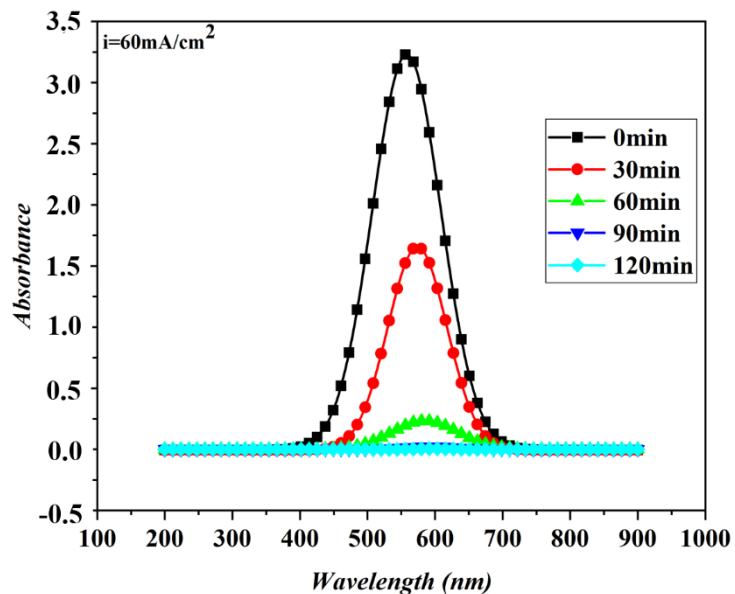

**Figure S2.** The UV/vis spectra of CV in electrochemical oxidation process on Ti/Pt/SnO<sub>2</sub> anode with ([CV]<sub>0</sub>=50 mg L<sup>-1</sup>, initial pH=7, temperature=25 °C) at different of current density.

Two aqueous solutions of crystal violet with a concentration of 10 mg L<sup>-1</sup> and 50 mg L<sup>-1</sup> were electrolyzed using 0.1 M of Na<sub>2</sub>SO<sub>4</sub> and sodium chloride NaCl at a concentration of 0.01 M. The spectrophotometric analysis of the samples is performed by scanning the UV-Visible spectrum between 200 and 900 nm Figs. S1 and S2.
